# Supplementary material for: Guanosine tetraphosphate relieves the negative regulation of Salmonella pathogenicity island-2 gene transcription exerted by the AT-rich ssrA discriminator region
Source: PubMed Central journal article supplement (PMC6013443; doi:10.1038/s41598-018-27780-9), 2018-06-21
Supplement: 41598_2018_27780_MOESM1_ESM.pdf [file 41598_2018_27780_MOESM1_ESM.pdf]

1 **Guanosine tetraphosphate relieves the negative regulation of *Salmonella* pathogenicity**  
2 **island-2 gene transcription exerted by the AT-rich *ssrA* discriminator region**

3  
4 Timothy Tapscott, Ju-Sim Kim, Matthew A. Crawford, Liam Fitzsimmons, Lin Liu, Jessica Jones-  
5 Carson, and Andrés Vázquez-Torres

6  
7 **Supplementary Information**

8  
9 **Supplementary Experimental Procedures**

10  
11 **NO<sub>2</sub><sup>-</sup> determination.** \*NO synthesis by interferon-gamma (IFN $\gamma$ )-stimulated J774A.1 cells was  
12 determined by measuring nitrite (NO<sub>2</sub><sup>-</sup>) generated by the reaction of nitric oxide with oxygen.  
13 NO<sub>2</sub><sup>-</sup> released into the culture supernatants by the macrophages 18 h after infection was  
14 measured after the addition of an equal volume of Griess reagent (0.5% sulfanilamide and  
15 0.05% N-1-naphthylethylenediamide hydrochloride in 2.5% phosphoric acid). The resulting  
16 change in color was read at 550 nm in a Versa Max spectrophotometer (Molecular Devices,  
17 Sunnyvale, CA). The NO<sub>2</sub><sup>-</sup> concentration was determined from a standard curve prepared with  
18 NaNO<sub>2</sub>.

19  
20 **Quantification of  $\beta$ -galactosidase expression.** *Salmonella* strains expressing the *lacZY*  
21 translational fusions were lysed with chloroform in 980  $\mu$ L of Z-buffer (0.06 M Na<sub>2</sub>HPO<sub>4</sub>, 0.04 M  
22 NaH<sub>2</sub>PO<sub>4</sub>, 0.01 M KCl, 0.001 M MgSO<sub>4</sub> and 0.05 M  $\beta$ -mercaptoethanol) containing 0.002% SDS  
23 (w/v). Samples were equilibrated at 30°C prior to the addition of 200  $\mu$ L of 4 mg/mL ortho-  
24 nitrophenyl- $\beta$ -galactoside (Sigma-Aldrich). The reactions were terminated by the addition of 500  
25  $\mu$ L of 1 M Na<sub>2</sub>CO<sub>3</sub>.  $\beta$ -galactosidase activity was measured with a Versa Max spectrophotometer

26 (Molecular Devices, Sunnyvale, CA) at 420 nm and 550 nm. Data are expressed in Miller units  
27 according to the equation:

28 
$$(2) 1,000 \times [(OD_{420} - 1.75 \times OD_{550})]/(T(\text{min}) \times V(\text{ml}) \times OD_{600}).$$

29

**Table S1.**  
**Bacterial**  
**Strains**

| Strain                       | Genotype                                                                                                                          | Source     |
|------------------------------|-----------------------------------------------------------------------------------------------------------------------------------|------------|
| S. Typhimurium strain 14028s | Wild-type                                                                                                                         | ATCC       |
|                              | F- $\phi$ 80 <i>lacZ</i> $\Delta$ M15 $\Delta$ ( <i>lacZYA-argF</i> ) U169                                                        |            |
| <i>E. coli</i> DH5 $\alpha$  | <i>recA1 endA1 hsdR17</i> (rK <sup>-</sup> , mK <sup>+</sup> ) <i>phoA</i><br><i>supE44</i> $\lambda$ - <i>thi-1 gyrA96 relA1</i> | ATCC       |
| AV07270                      | $\Delta$ <i>dksA</i> ::cm                                                                                                         | 1          |
| AV08140                      | $\Delta$ <i>relA</i> ::FRT $\Delta$ <i>spoT</i> ::FRT                                                                             | 2          |
| AV00203                      | Wild-type <i>sifA</i> :: <i>lacZY</i> -km                                                                                         | 3          |
| AV15023                      | $\Delta$ <i>dksA</i> ::cm <i>sifA</i> :: <i>lacZY</i> -km                                                                         | This study |
| AV15024                      | $\Delta$ <i>relA</i> ::FRT $\Delta$ <i>spoT</i> ::FRT <i>sifA</i> :: <i>lacZY</i> -km                                             | This study |
| AV00204                      | Wild-type <i>srfJ</i> :: <i>lacZY</i> -km                                                                                         | 3          |
| AV15005                      | $\Delta$ <i>dksA</i> ::cm <i>srfJ</i> :: <i>lacZY</i> -km                                                                         | This study |
| AV15006                      | $\Delta$ <i>relA</i> ::FRT $\Delta$ <i>spoT</i> ::FRT <i>srfJ</i> :: <i>lacZY</i> -km                                             | This study |
| AV00205                      | Wild-type <i>sspH2</i> :: <i>lacZY</i> -km                                                                                        | 3          |
| AV15008                      | $\Delta$ <i>dksA</i> ::cm <i>sspH2</i> :: <i>lacZY</i> -km                                                                        | This study |
| AV15009                      | $\Delta$ <i>relA</i> ::FRT $\Delta$ <i>spoT</i> ::FRT <i>sspH2</i> :: <i>lacZY</i> -km                                            | This study |
| AV00207                      | Wild-type <i>spiC</i> :: <i>lacZY</i> -km                                                                                         | 3          |
| AV15011                      | $\Delta$ <i>dksA</i> ::cm <i>spiC</i> :: <i>lacZY</i> -km                                                                         | This study |
| AV15012                      | $\Delta$ <i>relA</i> ::FRT $\Delta$ <i>spoT</i> ::FRT <i>spiC</i> :: <i>lacZY</i> -km                                             | This study |
| AV00206                      | Wild-type <i>sseE</i> :: <i>lacZY</i> -km                                                                                         | 3          |
| AV15017                      | $\Delta$ <i>dksA</i> ::cm <i>sseE</i> :: <i>lacZY</i> -km                                                                         | This study |
| AV15018                      | $\Delta$ <i>relA</i> ::FRT $\Delta$ <i>spoT</i> ::FRT <i>sseE</i> :: <i>lacZY</i> -km                                             | This study |
| AV15013                      | Wild-type pQF50- <i>ssaG</i>                                                                                                      | This study |
| AV15014                      | $\Delta$ <i>dksA</i> ::cm pQF50- <i>ssaG</i>                                                                                      | This study |
| AV15015                      | $\Delta$ <i>relA</i> ::FRT $\Delta$ <i>spoT</i> ::FRT pQF50- <i>ssaG</i>                                                          | This study |
| AV15019                      | Wild-type pQF50- <i>sseA</i>                                                                                                      | This study |
| AV15020                      | $\Delta$ <i>dksA</i> ::cm pQF50- <i>sseA</i>                                                                                      | This study |
| AV15021                      | $\Delta$ <i>relA</i> ::FRT $\Delta$ <i>spoT</i> ::FRT pQF50- <i>sseA</i>                                                          | This study |
| AV11276                      | Wild-type <i>sifA</i> :: <i>luc</i>                                                                                               | 4          |
| AV15027                      | $\Delta$ <i>dksA</i> ::cm <i>sifA</i> :: <i>luc</i>                                                                               | This study |
| AV15028                      | $\Delta$ <i>relA</i> $\Delta$ <i>spoT</i> <i>sifA</i> :: <i>luc</i>                                                               | This study |

|         |                                                              |              |    |
|---------|--------------------------------------------------------------|--------------|----|
| AV14025 | Wild-type Str <sup>R</sup>                                   | This study   | 30 |
| AV13150 | $\Delta dksA::cm$ Str <sup>R</sup>                           | This study   |    |
| AV13146 | $\Delta ssrB::km$ Str <sup>R</sup>                           | This study   |    |
| AV13149 | $\Delta ssrB::km \Delta dksA::cm$                            | This study   |    |
| AV14025 | $\Delta relA::FRT \Delta spoT::cm$ Str <sup>R</sup>          | This study   |    |
| AV14043 | $\Delta relA::FRT \Delta spoT::cm \Delta ssrB::km$           | This study   |    |
| AV11228 | Wild-type <i>ssrB</i> -FLAG                                  | This study   |    |
| AV15189 | $\Delta dksA::cm$ <i>ssrB</i> -FLAG                          | This study   |    |
| AV15190 | $\Delta relA::FRT \Delta spoT::FRT$ <i>ssrB</i> -FLAG        | This study   |    |
| AV15162 | $\Delta ssrAB::FRT$                                          | This study   |    |
| AV07104 | Wild-type <i>ssrB</i> -3xFLAG                                | <sup>5</sup> |    |
| AV15202 | <i>ssrA</i> <sub>Dsc</sub> <i>ssrB</i> -3xFLAG               | This study   |    |
| AV10369 | $\Delta dksA::FRT$ <i>put::dksA</i>                          | <sup>6</sup> |    |
| AV16176 | $\Delta relA::cm \Delta spoT::km$ <i>put::spoT::FRT</i>      | This study   |    |
| AV18094 | Wild-type <i>Salmonella</i> with pWSK29                      | This study   |    |
| AV18096 | Wild-type <i>Salmonella</i> with pWSK29- <i>ssrB</i> -3xFLAG | This study   |    |

**Table S2.**  
**Plasmids**

| Plasmid                         | Relevant Genotype                                         | Source        |
|---------------------------------|-----------------------------------------------------------|---------------|
| pQF50                           | <i>bla lacZ</i>                                           | 7             |
| pQF50- <i>ssaG</i>              | <i>bla PssaG(-276/+35) lacZ</i>                           | This study    |
| pQF50- <i>spiC</i>              | <i>bla PspiC(-195/+166) lacZ</i>                          | This study    |
| pGEX6P1                         | <i>bla PlacZ GST</i>                                      | GE Healthcare |
| pIDTSmart amp                   | <i>bla</i>                                                | IDT           |
| pTIM                            | <i>bla pIDTSmart amp rrnB &amp; rpoC term</i>             | This study    |
| pTIM- <i>ssrA</i>               | <i>bla pIDTSmart amp PssrA(-258/+1202)</i>                | This study    |
| pSK::cm                         | <i>bla FRT cat FRT pUC ori f1 lacZ<math>\alpha</math></i> | This study    |
| pKD13::km                       | <i>bla FRT ahp FRT oriR6K</i>                             | 8             |
| pTP223                          | <i>Plac-gam-bet-exo</i>                                   | 9             |
| pWSK29                          | <i>bla lacZ<math>\alpha</math> T7/T3 ori f1 pSC101ori</i> | 10            |
| pWSK29- <i>ssrB</i> -<br>3xFLAG | <i>ssrB-3xFLAG (-352 - +1564)</i>                         | This study    |

32 **Table S3. Primers**

| Gene                                                                            | Primer Sequence                                                                                                                                     |
|---------------------------------------------------------------------------------|-----------------------------------------------------------------------------------------------------------------------------------------------------|
| pTIM- <i>ssrA</i>                                                               | F: CGGAATTCCGCCAGCATGAATCCCTCCTC<br>R: GGGGTACCCCTTGTGCTGGTAAACGTGTGC                                                                               |
| $\Delta$ <i>ssrAB</i>                                                           | F: ACTTACAATTTGAAAAATTATTTATTAATAAACTGTTACGTGTAGGCTG<br>GAGCTGCTTCG<br>R: CGAAGCGACCACGTTGCGCCACTGGGCAAGCTGTTTTTCTGCATTCC<br>GGGGATCCGTCGAC         |
| <i>ssrA</i> <sub>Dsc</sub>                                                      | F: CATCGCCATCTTATTAATAAAAGTAATTG<br>R: CAATTACTTTTTAATAAGATGGCGATGTAGGCACATCGTAACAGTTTAT<br>TTAATAAATAATTT                                          |
| <i>ssrA5</i>                                                                    | F: GAATTCACATTTATTTGACTATAC                                                                                                                         |
| <i>ssrA3</i>                                                                    | R: GCTGCCCTCGCGAAAATTAAG                                                                                                                            |
| <i>ssrA4</i>                                                                    | R: GACAAAAGTACGTAATGACAG                                                                                                                            |
| <i>ssrB4</i>                                                                    | F: GAATTCAGAGCTACAGGAGCAGGATC                                                                                                                       |
| <i>orf242-1</i>                                                                 | R: CTGCAGCGCCTATAGTGTGATAAC                                                                                                                         |
| <i>orf242-2</i>                                                                 | F: ACTAGTTAGATTTCTTCCCCTCATTC                                                                                                                       |
| <i>orf242-3</i>                                                                 | R: GAGCTCATCAAAGCGTACCGTGGCGCCA                                                                                                                     |
| cmP2                                                                            | F: CTGCAGCATGGTCCATATGAATATCC<br>R: ACTAGTGTGTAGGCTGGAGCTGCTTC                                                                                      |
| $\Delta$ <i>relA</i> ::FRT $\Delta$ <i>spoT</i> ::FRT <i>put</i> :: <i>spoT</i> |                                                                                                                                                     |
| <i>spoT</i> pSK                                                                 | F: TAGGGCCCAGGTATAGCGCTTTAGTGAATAAAAACCG<br>R: GCCTCGAGCTAGTTTCGGTTACGGGTGA                                                                         |
| <i>put</i> :: <i>spoT</i>                                                       | F: TAGCGATGGGAGAGAGGACACGTTAATTATTCCATTTTAAAGGTATA<br>GCGCTTTAGTGAATAAAAACCG<br>R: TACTGCGGGTATTAATGCTGAAAACATCCATAACCCATTGGTGTAGG<br>CTGGAGCTGCTTC |
| <i>ssrB</i> -<br>3xFLAG                                                         | F: <u>GAATTCAGAGCTACAGGAGCAGGATC</u> (underlined, EcoRI site)<br>R: <u>CTGCAGCGCCTATAGTGTGATAAC</u> (underlined, PstI site)                         |

33

34

35  
36  
37  
38

**Table S4. Primers and probes for qPCR and *in vitro* transcription**

| <b>Gene</b>              | <b>Primer Sequence</b>                                                                       |
|--------------------------|----------------------------------------------------------------------------------------------|
| <i>ssrA</i> <sup>1</sup> | F: ATATTACGCACAACCTTGAT<br>R: CCAGTGAGCGATGTAGTAACCA<br>Probe: AAGCCGACGTCATCAACACCA         |
| <i>ssrA</i> <sup>2</sup> | F: TCATCGACTGGGTTATATATGAAG<br>R: AGATTGAGCAAATTCATAATGCTT<br>Probe: CTTTGGCACTTGATCACTATCGC |
| <i>ssrB</i>              | F: AGCGGCATTGCAAACAGT<br>R: TACCAATCATGGGATCAGCG<br>Probe: ATCGGGAAGCTATCCTGGCTG             |
| <i>ssaG</i>              | F: TCCCACATGGCGCACCAG<br>R: ATGATTCCACTAAGCATATCCTTGA<br>Probe: AAGCGCAATTTGCCTTACAGCAG      |

39 <sup>1</sup>Primer set and probe used for *ssrA* qPCR

40 <sup>2</sup>Primer set and probe used for *in vitro* transcription

41

## 42 **Supplementary Figure Legends**

43

44 **Fig S1. Interactions of *Salmonella* with J774A.1 cells.** The amount of nitrite ( $\text{NO}_2^-$ ) generated  
45 by macrophages 18 h after *Salmonella* infection was quantified by the Griess reaction (A).  
46 J774A.1 cells were stimulated with 200 U/ml  $\text{IFN}\gamma$  24 h prior to infection, or treated with 960  $\mu\text{M}$   
47 of the selective iNOS inhibitor N-iminoethyl-L-lysine (L-NIL) since the time of infection. The data  
48 represent the mean  $\pm$  S.D. from at least 3 biological replicates. \*\*\*  $p < 0.001$  as compared to  
49 untreated control (A). Transcriptional analysis of major SPI2 promoters fused to a promoterless  
50 *lacZY* reporter in *Salmonella* (B). Fold induction is the ratio of  $\beta$ -galactosidase enzymatic activity  
51 3 h after culture of *Salmonella* in 8  $\mu\text{M}$   $\text{MgCl}_2$  N9 medium over controls grown in 10 mM  $\text{MgCl}_2$   
52 N9 medium. The data are the mean  $\pm$  S.D. from 3 biological replicates. \*\*\*  $p < 0.001$  as  
53 compared to wild-type controls.

54

55 **Fig S2. Competitive index of *Salmonella* strains.** Competitive indices of *Salmonella* strains  
56 recovered livers of C57BL/6 mice 3 d after infection. Mice were inoculated i.p. with  $10^2$  (A) or  
57  $10^5$  (B) CFU of the indicated *Salmonella* strains. No detectable (nd) CFU were isolated for the  
58  $\Delta\text{relA}$   $\Delta\text{spoT}$  strain under the experimental conditions used in panel A. Competitive index was  
59 determined by the equation  $(\text{strain 1}/\text{strain 2})_{\text{output}}/(\text{strain 1}/\text{strain 2})_{\text{input}}$ . Non-significant (ns), or  
60 \* $p < 0.05$ .

61

62 **Fig. S3. SsrB protein expression in  $\Delta\text{dksA}$  *Salmonella* complemented with a *dksA* allele.**  
63 SsrB expression was determined by Western blotting in the indicated strains of *Salmonella*.  
64  $\Delta\text{dksA}$  *Salmonella* was complemented with the low copy plasmid pWSK29 containing the *dksA*  
65 gene. Two independent clones are shown for comparison.

66



67 **Fig. S4. Map of the pTIM plasmid used for the *in vitro* transcription reactions.** pTIM  
68 plasmid containing two multiple cloning sites (MCS) and two Rho-independent terminators (A).  
69 DNA containing MCS 1 and MCS 2 (blue) and *rrnB* and *rpoC* terminators (underlined) was  
70 inserted into pIDTSmart backbone by *in vitro* synthesis (B). The plasmids resulting from cloning  
71 gene promoters into MCS 1 were used as templates for *in vitro* transcription reactions.

72

73 **Fig S5. Cloning strategy for the construction of *Salmonella* *ssrA*<sub>Dsc</sub>.** The *ssrAB* locus was  
74 was cloned into pBluescript SK(+) containing *ssrAB*, *orf242*, and a chloramphenicol resistant  
75 cassette, yielding pSK-*ssrAB*-3xFLAG::cm plasmid. Mutations in the discriminator region were  
76 introduced by subcloning the *ssrA* promoter with a reverse primer containing the discriminator  
77 mutations (*ssrA*<sub>Dsc</sub>-R) and the *ssrA*5-F containing an *EcoRI* site. The resulting product  
78 generated the *ssrA*<sub>Dsc</sub>-P1 fragment. The *ssrA*<sub>Dsc</sub>-P1 promoter was stitched by PCR to the  
79 fragment *ssrA*<sub>Dsc</sub>-P2 containing an *NdeI* site. The *ssrA*<sub>Dsc</sub> was reintroduced to pSK-*ssrAB*-  
80 3xFLAG::cm by digesting and ligating with *EcoRI* and *NdeI* sites. Western blot analysis of SsrB  
81 in wild-type and *ssrA*<sub>Dsc</sub> *Salmonella* grown in high and low Mg<sup>2+</sup> media (B). DnaK was used as  
82 internal control. Ratio of SsrB signal / DnaK signal was calculated from densitometry in ImageJ.

83

84 **Fig S6. Full size Western blots.** Blots developed with an Amersham ECL Prime Western  
85 Blotting Detection Reagent (GE Healthcare and visualized with a Molecular Imager ChemiDoc  
86 XRS+ system (Bio-Rad). Panel A depicts the full blot of the cropped image shown in Fig 3C,  
87 and panel B depicts the full blot of the cropped image shown in Fig 4D.

88

89 **References**

- 90 1 Henard, C. A., Bourret, T. J., Song, M. & Vazquez-Torres, A. Control of redox balance  
91 by the stringent response regulatory protein promotes antioxidant defenses of  
92 *Salmonella*. *J Biol Chem.* **285**, 36785-36793 (2010).
- 93 2 Henard, C. A. & Vazquez-Torres, A. DksA-dependent resistance of *Salmonella enterica*  
94 serovar Typhimurium against the antimicrobial activity of inducible nitric oxide synthase.  
95 *Infect Immun.* **80**, 1373-1380 (2012).
- 96 3 McCollister, B. D., Bourret, T. J., Gill, R., Jones-Carson, J. & Vázquez-Torres, A.  
97 Repression of SPI2 transcription by nitric oxide-producing, IFN $\gamma$ -activated macrophages  
98 promotes maturation of *Salmonella* phagosomes. *J Exp Med.* **202**, 625-635 (2005).
- 99 4 Xu, X. & Hensel, M. Systematic Analysis of the SsrAB Virulon of *Salmonella enterica*.  
100 *Infect Immun.* **78**, 49-58 (2010).
- 101 5 Husain, M. *et al.* Redox sensor SsrB Cys203 enhances *Salmonella* fitness against nitric  
102 oxide generated in the host immune response to oral infection. *Proc Natl Acad Sci U S*  
103 *A.* **107**, 14396-14401 (2010).
- 104 6 Crawford, M. A. *et al.* Redox-active sensing by bacterial DksA transcription factors is  
105 determined by cysteine and zinc content. *mBio.* **7**, e02161-02115 (2016).
- 106 7 Jobling, M. G. & Holmes, R. K. Characterization of *hapR*, a positive regulator of the  
107 *Vibrio cholerae* HA/protease gene *hap*, and its identification as a functional homologue  
108 of the *Vibrio harveyi luxR* gene. *Mol Microbiol.* **26**, 1023-1034 (1997).
- 109 8 Datsenko, K. A. & Wanner, B. L. One-step inactivation of chromosomal genes in  
110 *Escherichia coli* K-12 using PCR products. *Proc Natl Acad Sci U S A.* **97**, 6640-6645  
111 (2000).
- 112 9 Murphy, K. C. Use of bacteriophage  $\lambda$  recombination functions to promote gene  
113 replacement in *Escherichia coli*. *J Bacteriol.* **180**, 2063-2071 (1998).
- 114 10 Rong Fu, W. & Kushner, S. R. Construction of versatile low-copy-number vectors for  
115 cloning, sequencing and gene expression in *Escherichia coli*. *Gene.* **100**, 195-199  
116 (1991).  
117  
118

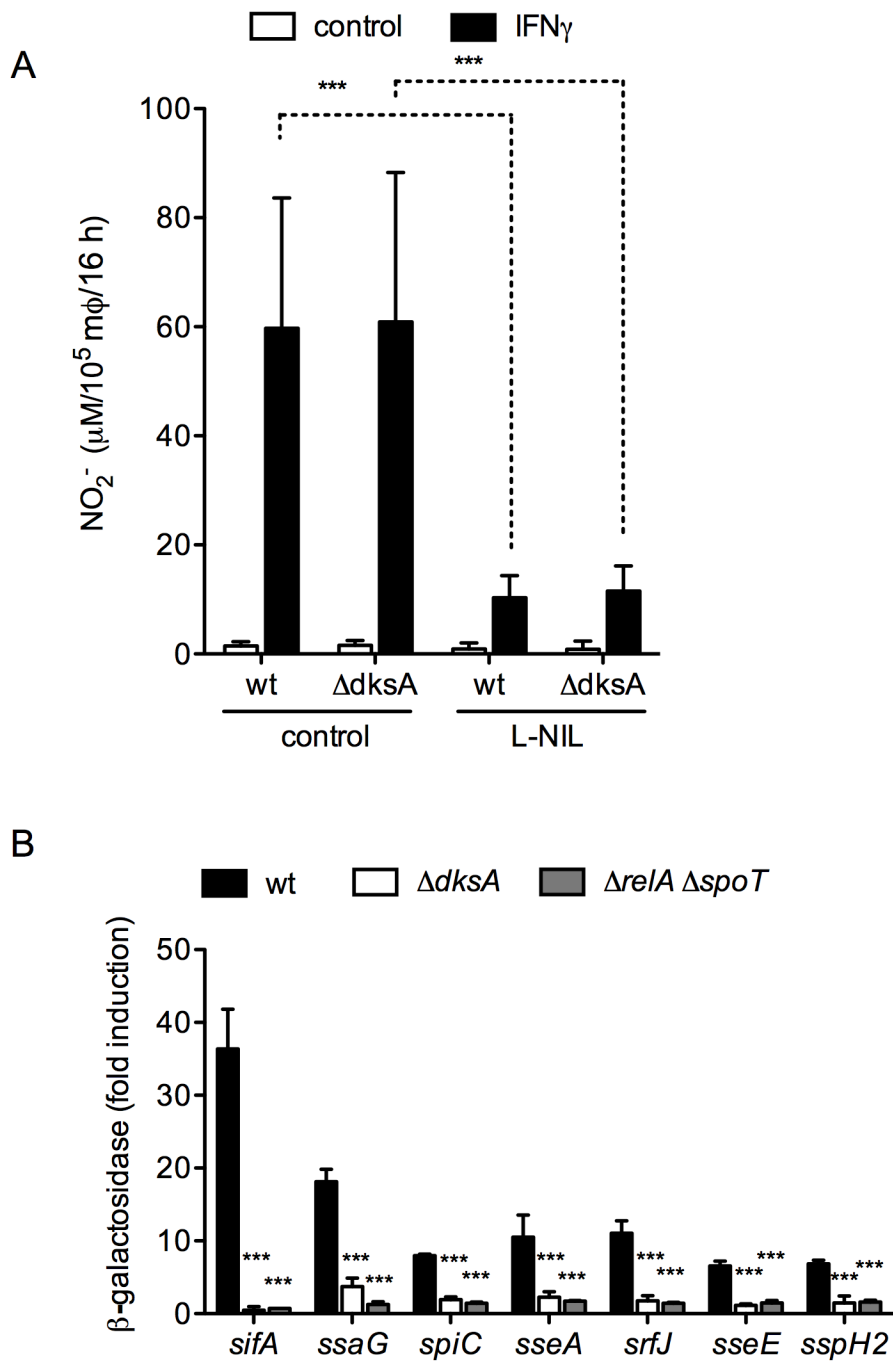

119  
120 Fig. S1  
121



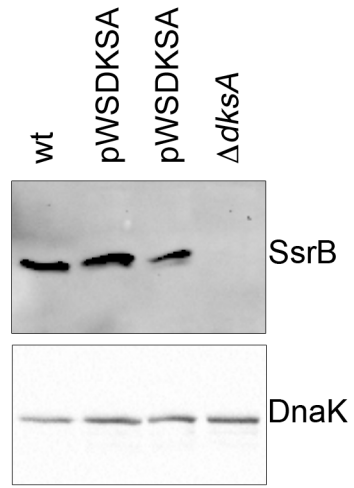

Fig. S3

125  
126  
127

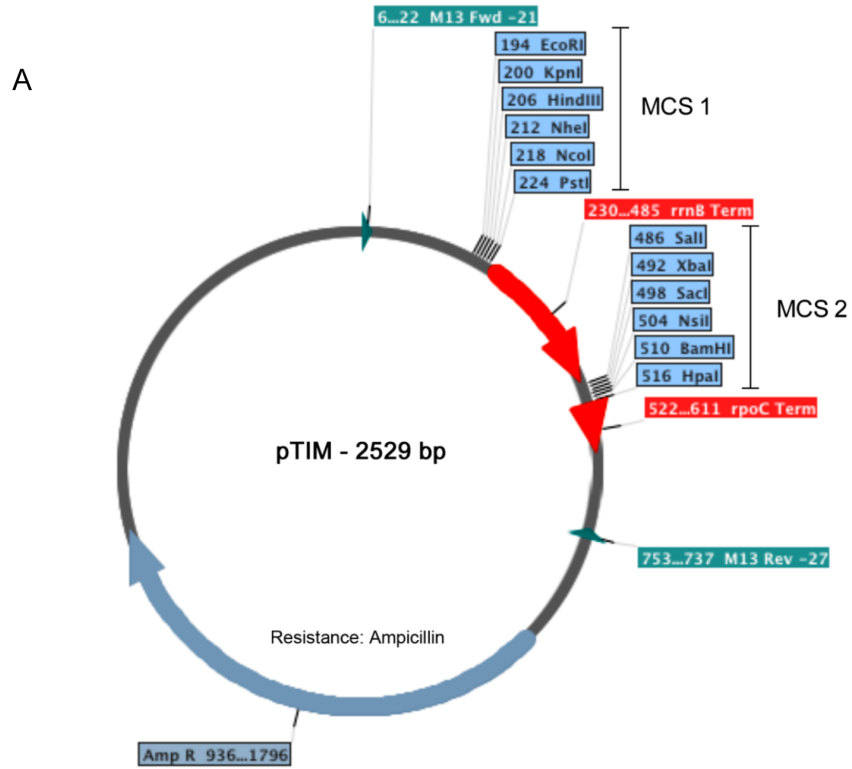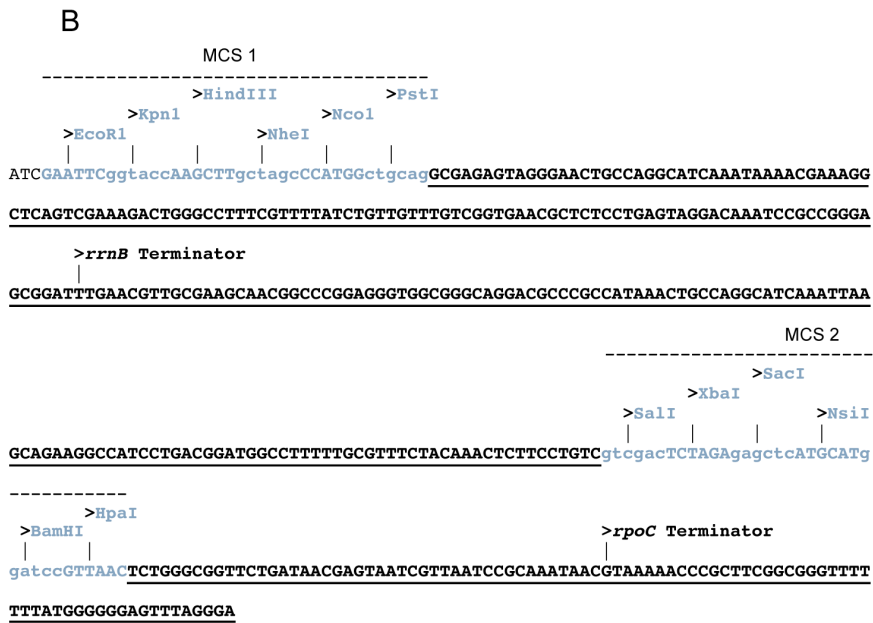

128  
129 Fig. S4  
130

A

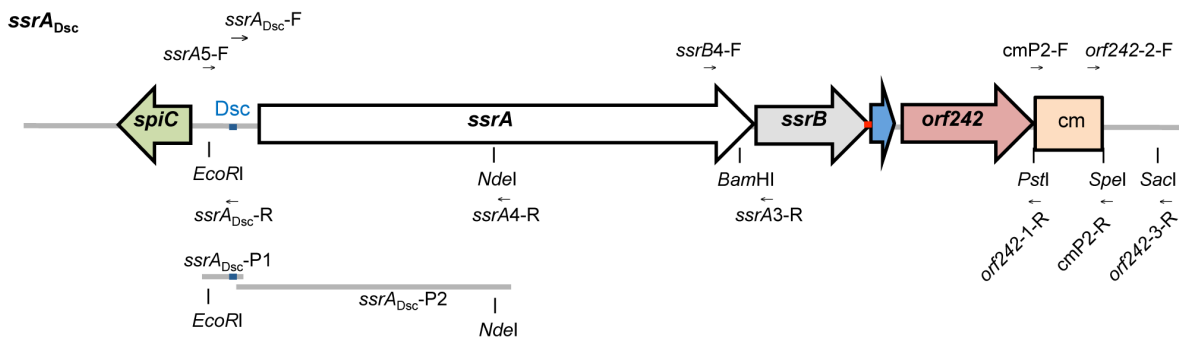

B

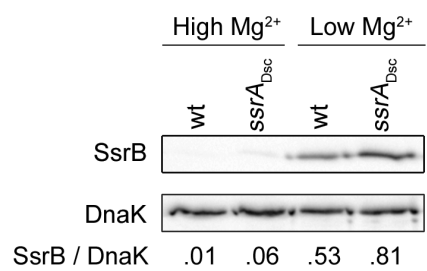

131  
132 Fig. S5

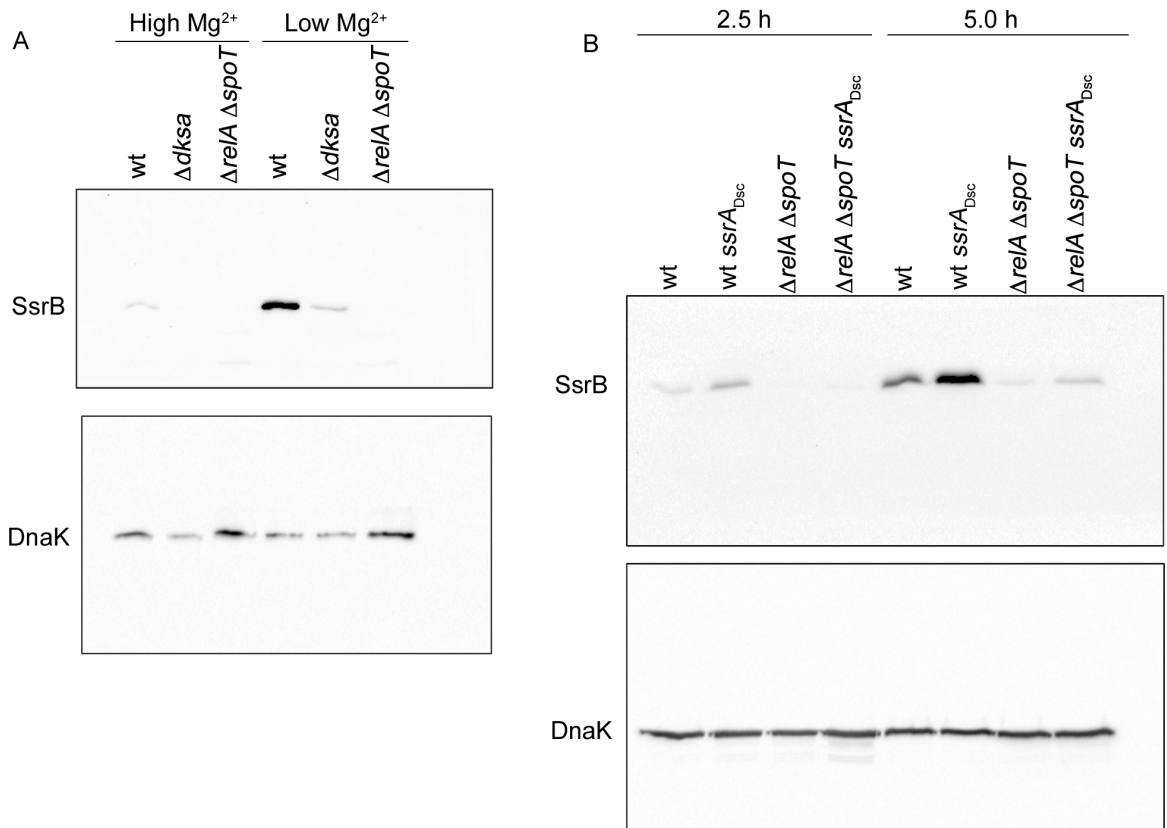

133  
134 Fig. S6
